# Supplementary material for: A heterojunction of high-entropy alloy and nitrogen-doped carbon nanospheres for efficient electromagnetic wave absorption
Source: Royal Society of Chemistry journal article supplement (doi:10.1039/d4tc05493h), 2025-01-01
Supplement: d4tc05493h1.pdf [file d4tc05493h1.pdf]

## **A heterojunction of high-entropy alloy and nitrogen-doped carbon nanospheres for efficient electromagnetic wave absorption**

*Qin Zhang<sup>a</sup>, Ying Ye<sup>a</sup>, Lei Sun<sup>a</sup>, Ping Sun<sup>b\*\*</sup>, Jie Wei<sup>a\*</sup>, Qi Gan<sup>a\*</sup>*

*<sup>a</sup> Shanghai Key Laboratory of Advanced Polymeric Materials, School of Materials Science and Engineering, East China University of Science and Technology, 200237, PR China*

*<sup>b</sup> Department of Orthopedics, Shanghai Eighth People's Hospital, Shanghai, 200235, PR China*

*\* Corresponding author. Shanghai Key Laboratory of Advanced Polymeric Materials, School of Materials Science and Engineering, East China University of Science and Technology, 200237, PR China*

*\*\* Corresponding author. Department of Orthopedics, Shanghai Eighth People's Hospital, Shanghai, 200235, PR China*

*E-mail address: sunping1127@126.com (P. Sun), jiewei7860@sina.com (J. Wei), ganqi789@163.com (Q. Gan)*

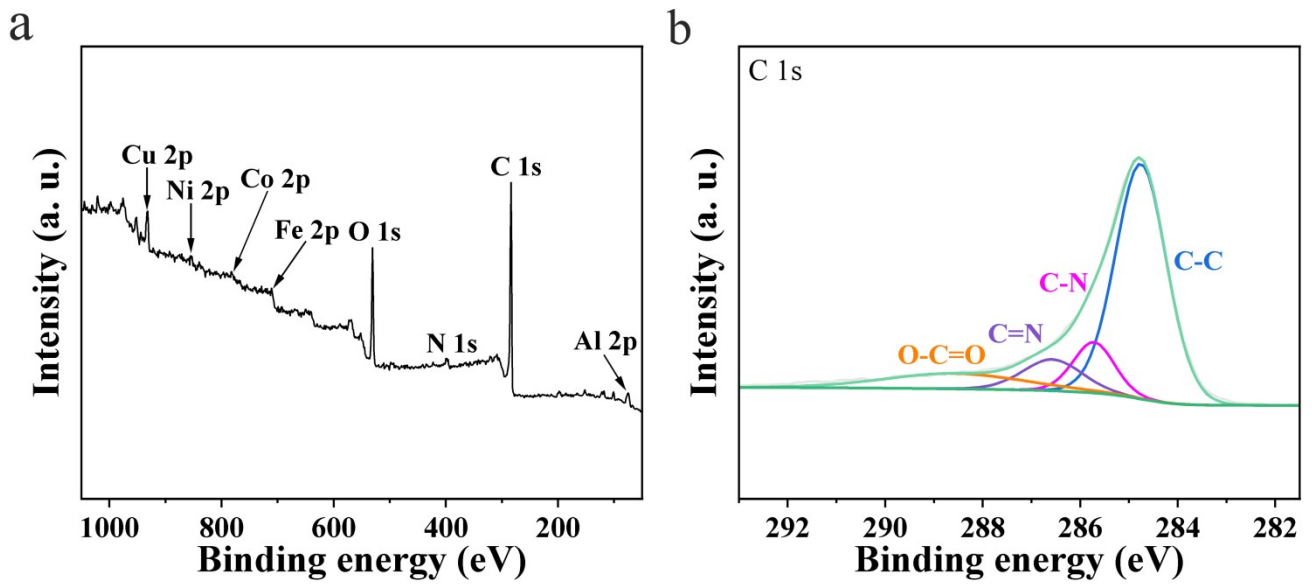

**Fig. S1** (a) XPS survey spectrum and (b) high-resolution XPS spectrum of C 1s of HEA/NC2.

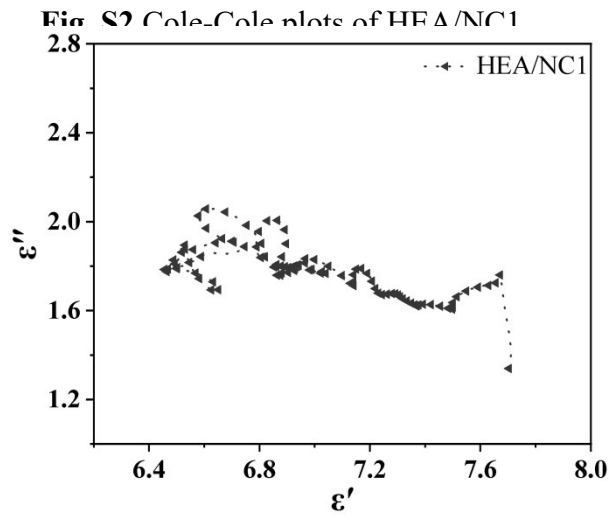

**Fig. S2** Cole-Cole plots of HEA/NC1

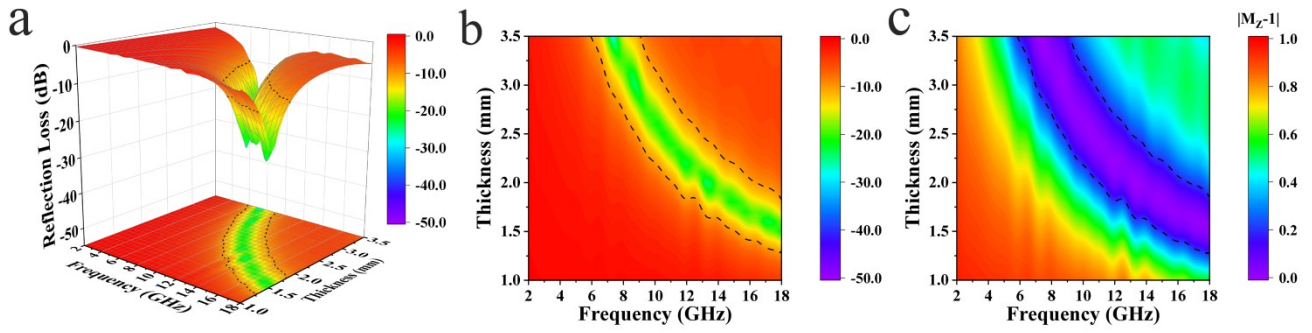

Fig. S3 (a) 3D RL surface plots, (b) 2D RL projections and (c)  $|M_Z-1|$  curves of HEA/NC1.

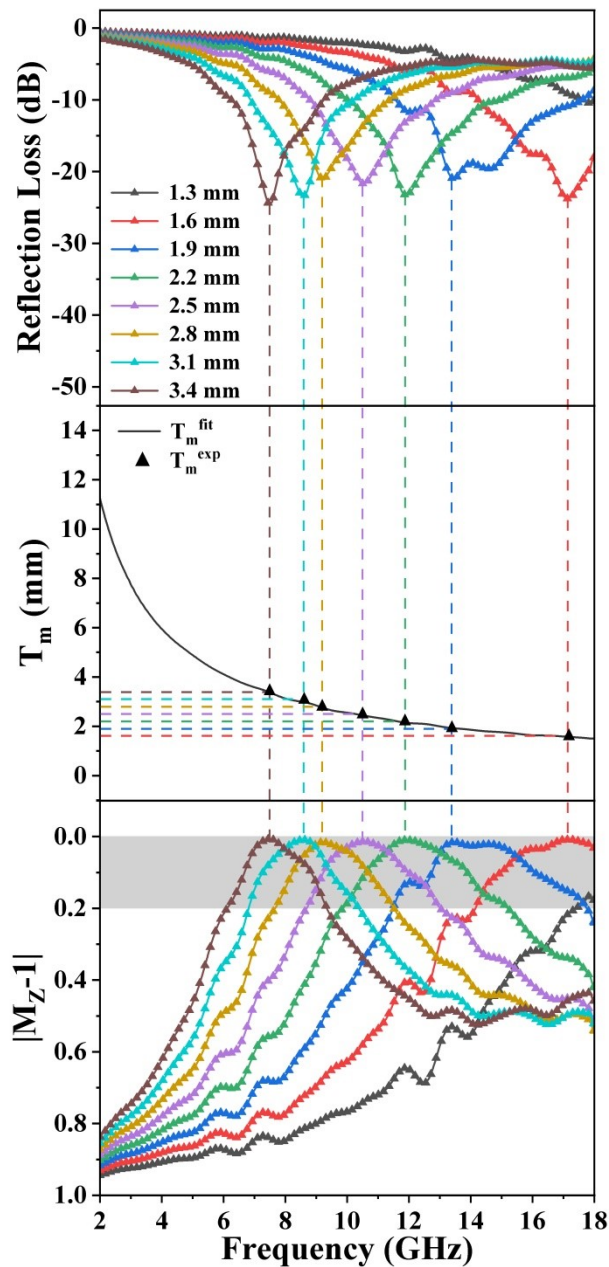

Fig. S4 2D RL,  $|M_Z-1|$  curves and corresponding theoretical matching thickness curves at different thicknesses of HEA/NC1.

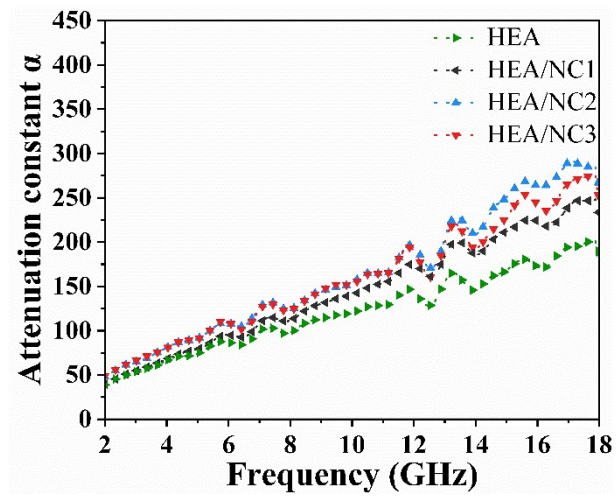

Fig. S5 Attenuation constant ( $\alpha$ ) curves of HEA and HEA/NC.

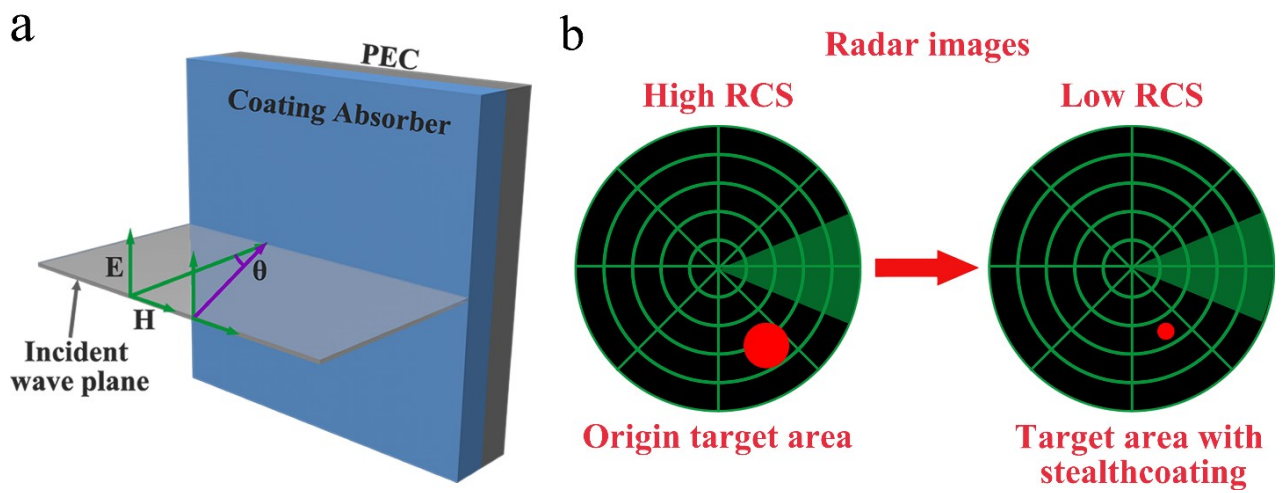

Fig. S6 Schematic diagram of (a) RCS modeling and (b) reduced radar imaging

**Table S1.** The content of carbon and nitrogen in the HEA/NC samples

| Samples | C (wt%) | N (wt%) |
|---------|---------|---------|
| HEA/NC1 | 17.98   | 2.07    |
| HEA/NC2 | 25.05   | 2.92    |
| HEA/NC3 | 30.37   | 3.51    |

**Table S2.** Comparison of wave-absorbing properties between HEA/NC2 and other HEA-based materials

| Absorbers                                                                                 | RLmin/dB | d(RLmin)/mm | EAB/GHz | d(EAB)/mm | Filling ratio/wt% | Refs.     |
|-------------------------------------------------------------------------------------------|----------|-------------|---------|-----------|-------------------|-----------|
| FeCoNiCuMn <sub>0.5</sub> /C                                                              | -52.3    | 2.35        | 5.52    | 2.00      | 20                | 5         |
| FeCoNiCuTi <sub>0.2</sub>                                                                 | -47.8    | 2.16        | 4.76    | 2.65      | 50                | 11        |
| FeCoNiCr#CN10                                                                             | -32.3    | 3.27        | 4.46    | 2.58      | 70                | 13        |
| FeCoNiCuC <sub>0.04</sub>                                                                 | -61.1    | 1.72        | 5.1     | 1.70      | 65                | 14        |
| FeCoNiCrCuAl <sub>0.3</sub>                                                               | -40.2    | 1.70        | 4.48    | 1.70      | 50                | 15        |
| Pt <sub>18</sub> Ni <sub>26</sub> Fe <sub>15</sub> Co <sub>14</sub> Cu <sub>27</sub> /rGO | -41.8    | 4.00        | 2.50    | 2.00      | 50                | 16        |
| HEA@air@Ni-NiO                                                                            | -41.4    | 1.80        | 4.00    | 1.30      | 50                | 17        |
| FeCoNiMn#P50                                                                              | -62.4    | 2.46        | 4.10    | 2.75      | 70                | 49        |
| HEA/NC2                                                                                   | -56.3    | 1.80        | 5.69    | 1.80      | 30                | This work |
